# Supplementary material for: Atherosclerotic Cardiovascular Disease Events in Adults With CKD Taking a Moderate- or High-Intensity Statin: The Chronic Renal Insufficiency Cohort (CRIC) Study
Source: PubMed Central journal article supplement — Kidney Med. 2021 Jun 19;3(5):722–731.e1. doi: 10.1016/j.xkme.2021.04.008 (PMC8515092; doi:10.1016/j.xkme.2021.04.008), 2021-06-19
Supplement: mmc1.pdf [file mmc1.pdf]

**Figure S1.** Cascade of Chronic Renal Insufficiency Cohort study participants included in the current analysis.

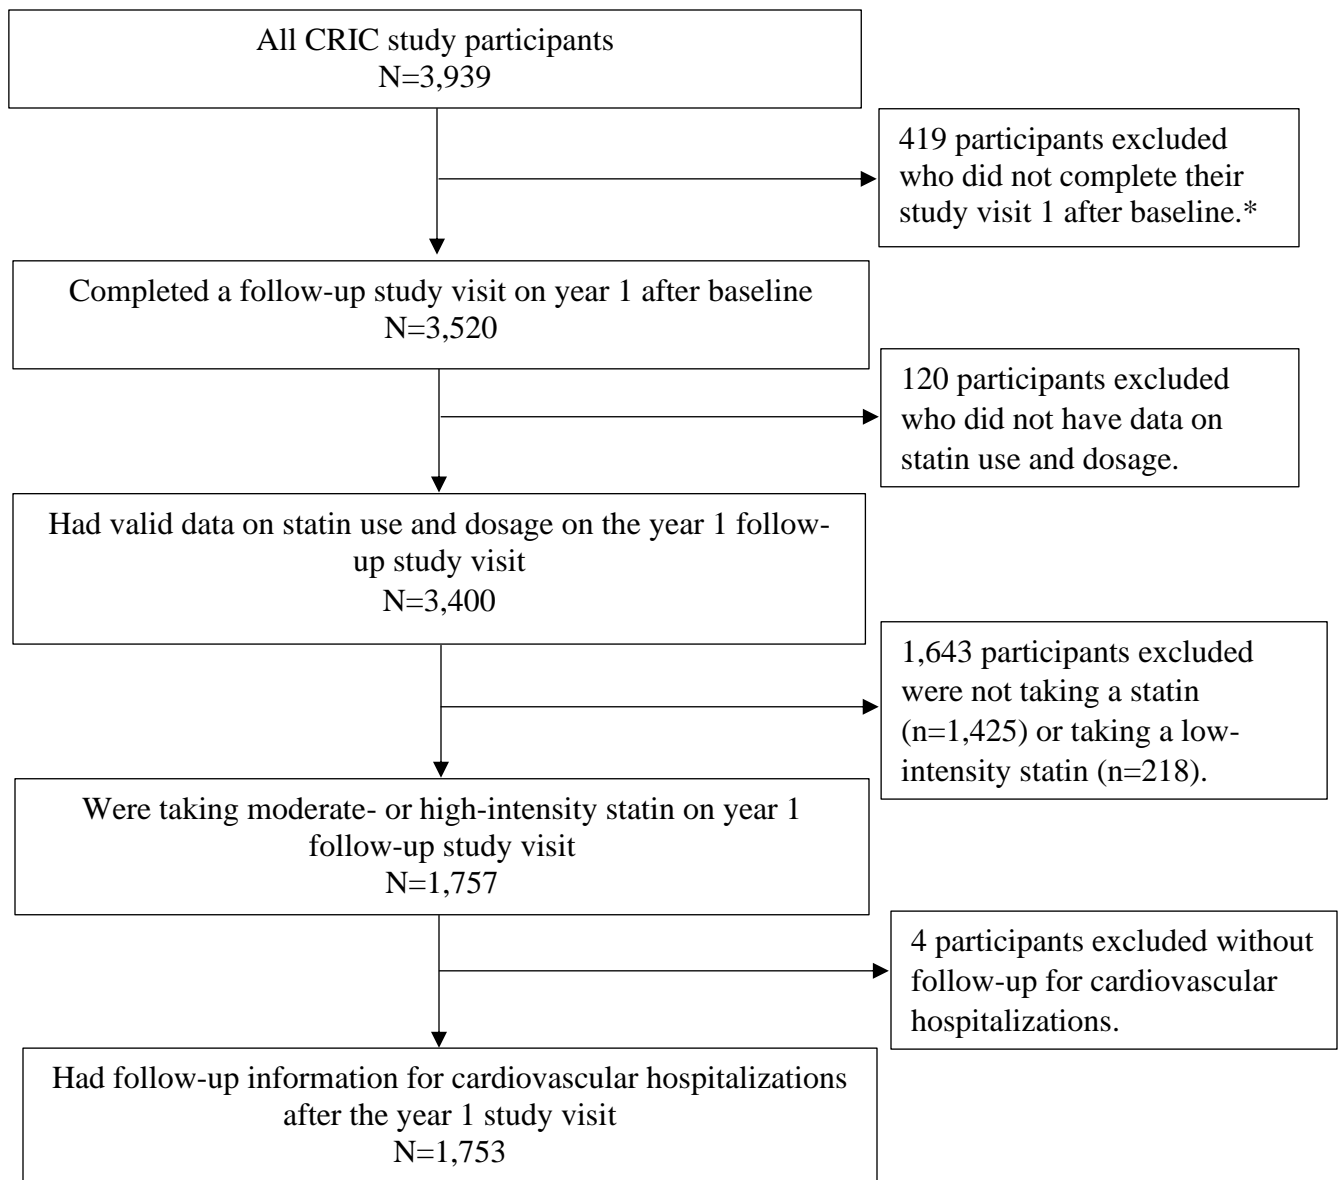

CRIC: Chronic Renal Insufficiency Cohort.

\* Of the 419 participants excluded because they did not attend the year 1 study visit, 70 (16.7%) died before the year 1 study visit, and 214 (51.1%) completed at least 1 follow-up study visit or phone call after the year 1 study visit. The remaining 135 (32.2%) participants did not die before the year 1 study visit and did not complete any of the follow-up study visits or phone calls after the year 1 study visit.

**Figure S2.** Cumulative incidence of myocardial infarction, ischemic stroke and peripheral artery disease by the 2018 AHA/ACC atherosclerotic cardiovascular disease risk categories.

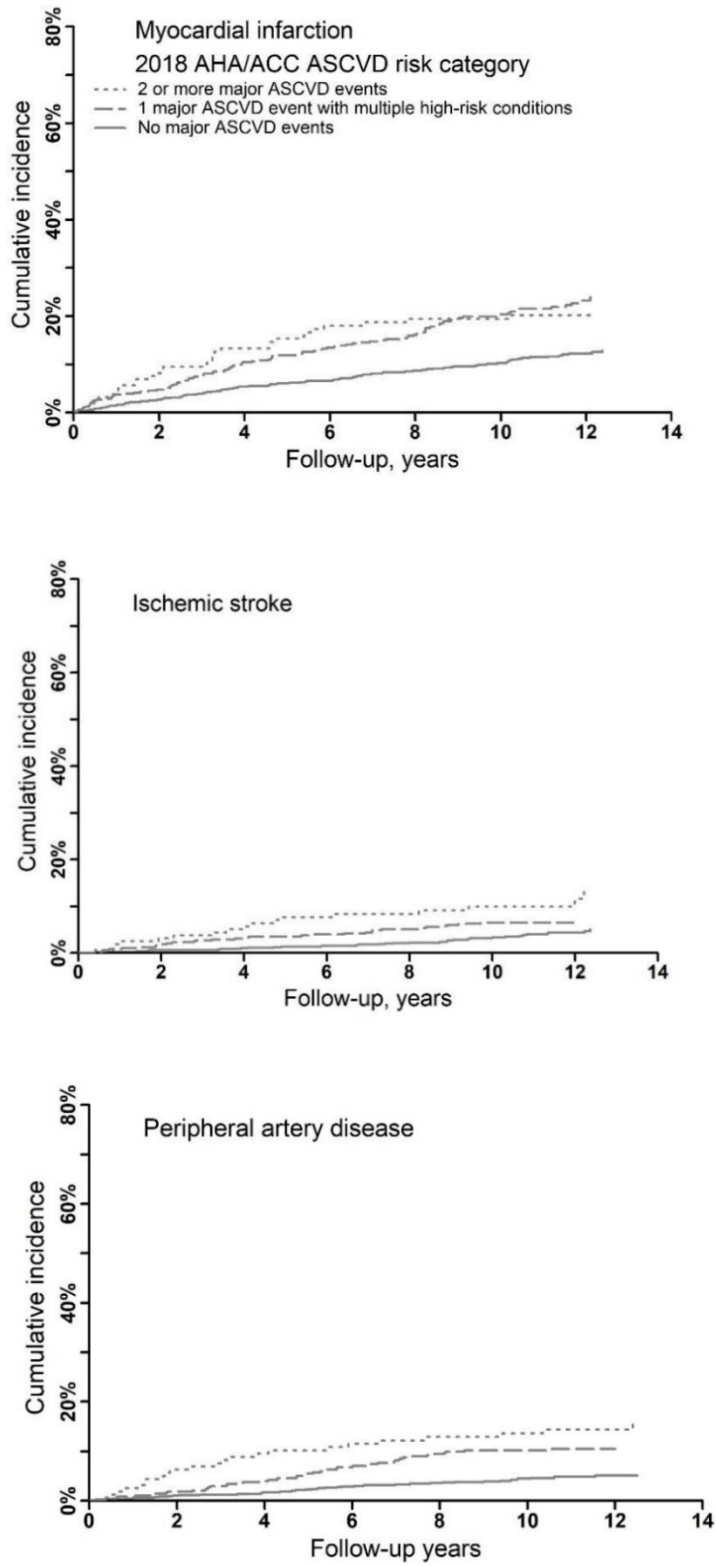

ACC: American College of Cardiology; AHA: American Heart Association; ASCVD: Atherosclerotic cardiovascular disease.

Atherosclerotic cardiovascular disease events include myocardial infarction, ischemic stroke or peripheral artery disease.

Cumulative incidence was calculated accounting for the competing risk of death.

**Figure S3.** Cumulative incidence of total cardiovascular disease, heart failure, and all-cause mortality by the 2018 AHA/ACC atherosclerotic cardiovascular disease risk categories.

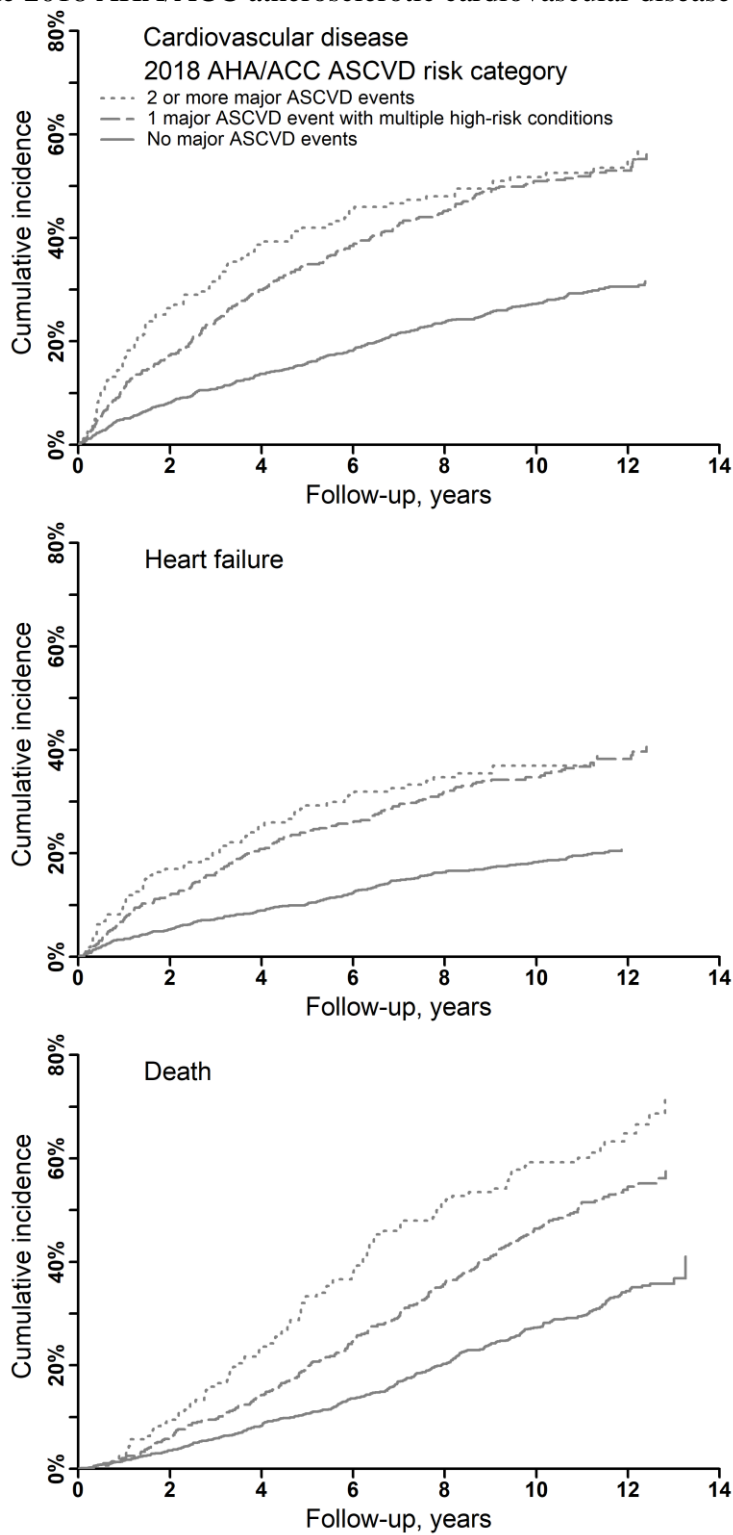

ACC: American College of Cardiology; AHA: American Heart Association; ASCVD: Atherosclerotic cardiovascular disease.

Cardiovascular disease events include ASCVD events or heart failure.

Cumulative incidence was calculated accounting for the competing risk of death except for all-cause mortality. No competing risk was considered for the analysis of all-cause mortality.

**Table S1.** Major atherosclerotic cardiovascular disease events and high-risk conditions in the 2018 AHA/ACC cholesterol guideline and their definitions as operationalized using the Chronic Renal Insufficiency Cohort study data.

| <b>Major ASCVD events or high-risk conditions</b>                           | <b>Definition in the CRIC study</b>                                                                                                                                                                                                                                                                                |
|-----------------------------------------------------------------------------|--------------------------------------------------------------------------------------------------------------------------------------------------------------------------------------------------------------------------------------------------------------------------------------------------------------------|
| <i>Major ASCVD events</i>                                                   |                                                                                                                                                                                                                                                                                                                    |
| History of coronary heart disease                                           | Defined by self-report of a prior diagnosis of heart attack or angina by a doctor or other health professional using data collected at the year 0 study visit.                                                                                                                                                     |
| History of stroke                                                           | Defined by self-report of a prior diagnosis of stroke by a doctor or other health professional using data collected at the year 0 study visit.                                                                                                                                                                     |
| History of PAD                                                              | Defined by self-report of a prior diagnosis of claudication by a doctor or other health professional, or an amputation or an artery revascularization procedure in arms or legs using data collected at the year 0 study visit.                                                                                    |
| Recent acute coronary syndrome event                                        | Defined by an MI hospitalization between the year 0 and year 1 study visits which was adjudicated by study clinicians. For participants with multiple confirmed MI hospitalizations, each hospitalization was counted as an event.                                                                                 |
| Acute ischemic stroke event                                                 | Defined by an ischemic stroke hospitalization between the year 0 and year 1 study visits which was subsequently confirmed by study clinicians. For participants with multiple confirmed ischemic stroke hospitalizations, each hospitalization was counted as an event.                                            |
| Acute PAD event                                                             | Defined by a PAD hospitalization between the year 0 and year 1 study visits which was subsequently confirmed by study clinicians. For participants with multiple confirmed PAD hospitalizations, each hospitalization was counted as an event.                                                                     |
| <i>High-risk conditions</i>                                                 |                                                                                                                                                                                                                                                                                                                    |
| Age $\geq 65$ years old                                                     | Defined at the year 1 follow-up study visit.                                                                                                                                                                                                                                                                       |
| Prior coronary artery bypass grafting or percutaneous coronary intervention | Defined by self-report of a prior coronary artery bypass grafting or percutaneous coronary intervention during the year 0 or year 1 study visits.                                                                                                                                                                  |
| Diabetes                                                                    | Defined by a plasma glucose $\geq 126$ mg/dL after fasting for a minimum of 8 hours, a plasma glucose $\geq 200$ mg/dL after fasting for less than 8 hours, hemoglobin A1c $\geq 6.5\%$ , or self-reported use of insulin or glucose-lowering medication using data collected at the year 1 follow-up study visit. |

|                                                        |                                                                                                                                                                                                                                                                                                                                                                                  |
|--------------------------------------------------------|----------------------------------------------------------------------------------------------------------------------------------------------------------------------------------------------------------------------------------------------------------------------------------------------------------------------------------------------------------------------------------|
| Hypertension                                           | Defined by a systolic blood pressure $\geq 140$ mm Hg, diastolic blood pressure $\geq 90$ mm Hg or self-reported use of antihypertensive medication using data collected at the year 1 follow-up study visit. For this analysis, systolic and diastolic blood pressure were calculated as the average of the three study blood pressure measurements conducted by trained staff. |
| Current smoking                                        | Defined by reporting having smoked more than 100 cigarettes in the lifetime and currently smoking, even occasionally using data collected at the year 1 follow-up study visit.                                                                                                                                                                                                   |
| LDL cholesterol $\geq 100$ mg/dL while taking a statin | Defined by an LDL cholesterol $\geq 100$ mg/dL and taking a statin using data collected at the year 1 follow-up study visit.                                                                                                                                                                                                                                                     |
| History of heart failure                               | Defined by self-report of prior diagnosis of heart failure by a doctor or other health professional using data collected at the year 0 study visit, or by a heart failure hospitalization between the year 0 and year 1 study visits which was subsequently confirmed by CRIC study clinicians.                                                                                  |

ACC: American College of Cardiology; AHA: American Heart Association; ASCVD: atherosclerotic cardiovascular disease; CRIC: Chronic Renal Insufficiency Cohort; LDL: low-density lipoprotein; MI: myocardial infarction; PAD: peripheral artery disease.

According to the 2018 AHA/ACC guideline on the management of blood cholesterol a very high risk for ASCVD is defined as having a history of one major ASCVD event with multiple high-risk conditions or  $\geq 2$  major ASCVD events.

Reproduced and adapted from: Grundy SM, Stone NJ, Bailey AL, Beam C, Birtcher KK, Blumenthal RS, Braun LT, de Ferranti S, Faiella-Tommasino J, Forman DE, Goldberg R, Heidenreich PA, Hlatky MA, Jones DW, Lloyd-Jones D, Lopez-Pajares N, Ndumele CE, Orringer CE, Peralta CA, Saseen JJ, Smith SC, Jr., Sperling L, Virani SS, Yeboah J. 2018 AHA/ACC/AACVPR/AAPA/ABC/ACPM/ADA/AGS/APhA/ASPC/NLA/PCNA Guideline on the Management of Blood Cholesterol: A Report of the American College of Cardiology/American Heart Association Task Force on Clinical Practice Guidelines. *Journal of the American College of Cardiology*. 2019;73(24): 3168-3209.<sup>1</sup>

**Table S2.** Dosages used to define high-, moderate-, and low-intensity statin therapy by statin type.

| <b>Statin type</b> | <b>High-intensity</b> | <b>Moderate-intensity</b> | <b>Low-intensity</b> |
|--------------------|-----------------------|---------------------------|----------------------|
| Atorvastatin       | 40-80 mg              | 10-20 mg                  | -                    |
| Rosuvastatin       | 20-40 mg              | 5-10 mg                   | -                    |
| Simvastatin        | 80 mg                 | 20-40 mg                  | 10 mg                |
| Fluvastatin        | -                     | 80 mg (or 40 mg BID)      | 20-40 mg             |
| Pitavastatin       | -                     | 1-4 mg                    | -                    |
| Pravastatin        | -                     | 40-80 mg                  | 10-20 mg             |
| Lovastatin         | -                     | 40-60 mg                  | 10-20 mg             |

BID: Bis In Die (twice a day).

Adapted from: Grundy SM, Stone NJ, Bailey AL, Beam C, Birtcher KK, Blumenthal RS, Braun LT, de Ferranti S, Faiella-Tommasino J, Forman DE, Goldberg R, Heidenreich PA, Hlatky MA, Jones DW, Lloyd-Jones D, Lopez-Pajares N, Ndumele CE, Orringer CE, Peralta CA, Saseen JJ, Smith SC, Jr., Sperling L, Virani SS, Yeboah J. 2018 AHA/ACC/AACVPR/AAPA/ABC/ACPM/ADA/AGS/APhA/ASPC/NLA/PCNA Guideline on the Management of Blood Cholesterol: A Report of the American College of Cardiology/American Heart Association Task Force on Clinical Practice Guidelines. *Journal of the American College of Cardiology*. 2019; 73(24): 3168-3209.<sup>1</sup>

**Table S3.** Definitions of outcome events including myocardial infarction, ischemic stroke, peripheral artery disease, and heart failure.

| <b>Outcome events</b>     | <b>Definition</b>                                                                                                                                                                                                                                                                                                                                                       |
|---------------------------|-------------------------------------------------------------------------------------------------------------------------------------------------------------------------------------------------------------------------------------------------------------------------------------------------------------------------------------------------------------------------|
| Myocardial infarction     | A myocardial infarction was defined based on symptoms, cardiac biomarker levels, and electrocardiograms consistent with acute myocardial ischemia. <sup>2</sup>                                                                                                                                                                                                         |
| Ischemic stroke           | An ischemic stroke was defined by a sudden or rapid onset of one major or two minor neurologic signs or symptoms within a cerebrovascular distribution lasting for more than 24 hours or until the patient died, without evidence of hemorrhage on computed tomography or magnetic resonance imaging performed within 24 hours of the onset of symptoms. <sup>3,4</sup> |
| Peripheral artery disease | A peripheral artery disease hospitalization was defined by a hospitalization resulting in a peripheral revascularization procedure (surgical bypass or angioplasty) or major amputation as adjudicated by a trained research nurse. <sup>5,6</sup>                                                                                                                      |
| Heart failure             | A heart failure hospitalization was defined based on clinical symptoms, physical examination of the heart and lungs, radiographic evidence of pulmonary congestion, and, when available, central venous hemodynamic monitoring data, and echocardiographic imaging. <sup>7</sup>                                                                                        |

**Table S4.** Atherosclerotic cardiovascular disease event rates by the 2018 AHA/ACC atherosclerotic cardiovascular disease risk categories and on-treatment LDL cholesterol levels.

| Outcomes                                   | ASCVD risk category              |                                                                     |                                        |
|--------------------------------------------|----------------------------------|---------------------------------------------------------------------|----------------------------------------|
|                                            | No history of major ASCVD events | History of one major ASCVD event with multiple high-risk conditions | History of $\geq 2$ major ASCVD events |
| <b>LDL cholesterol &lt; 70 mg/dL</b>       |                                  |                                                                     |                                        |
|                                            | <b>N=220</b>                     | <b>N=148</b>                                                        | <b>N=45</b>                            |
| ASCVD events                               |                                  |                                                                     |                                        |
| Events/person-years                        | 46/1,805                         | 46/1,045                                                            | 15/290                                 |
| Unadjusted rate (95% CI)                   | 25.5 (18.1, 32.9)                | 44.0 (33.3, 56.7)                                                   | 51.7 (25.6, 78.0)                      |
| Adjusted rate (95% CI)                     | 26.7 (18.6, 34.8)                | 44.7 (31.5, 58.0)                                                   | 55.5 (25.8, 85.2)                      |
| Adjusted rate difference (95% CI)          | 0 (ref)                          | 18.0 (2.5, 33.6)                                                    | 28.8 (-2.0, 59.6)                      |
| Hazard ratio (95% CI)                      | 1 (ref)                          | 1.40 (0.93, 2.11)                                                   | 1.55 (0.86, 2.78)                      |
| Myocardial infarction                      |                                  |                                                                     |                                        |
| Events/person-years                        | 26/1,848                         | 29/1,108                                                            | 7/328                                  |
| Unadjusted rate (95% CI)                   | 14.1 (8.7, 19.5)                 | 26.2 (16.6, 35.7)                                                   | 21.3 (5.5, 37.2)                       |
| Adjusted rate (95% CI)                     | 15.0 (8.9, 21.0)                 | 25.4 (15.9, 34.9)                                                   | 22.8 (4.2, 41.4)                       |
| Adjusted rate difference (95% CI)          | 0 (ref)                          | 10.4 (-0.8, 21.7)                                                   | 7.8 (-11.8, 27.4)                      |
| Hazard ratio (95% CI)                      | 1 (ref)                          | 1.45 (0.86, 2.46)                                                   | 1.16 (0.50, 2.70)                      |
| Ischemic stroke                            |                                  |                                                                     |                                        |
| Events/person-years                        | 10/1,917                         | 8/1,171                                                             | 3/334                                  |
| Unadjusted rate (95% CI)                   | 5.2 (2.0, 8.5)                   | 6.8 (2.1, 11.6)                                                     | 9.0 (0.0, 19.1)*                       |
| Adjusted rate (95% CI)                     | 5.6 (2.0, 9.3)                   | 7.1 (2.1, 12.1)                                                     | 11.5 (0.0, 25.8)*                      |
| Adjusted rate difference (95% CI)          | 0 (ref)                          | 1.5 (-4.7, 7.7)                                                     | 5.9 (-8.9, 20.6)                       |
| Hazard ratio (95% CI)                      | 1 (ref)                          | 1.22 (0.48, 3.07)                                                   | 1.28 (0.36, 4.54)                      |
| Peripheral artery disease                  |                                  |                                                                     |                                        |
| Events/person-years                        | 17/1,898                         | 19/1,130                                                            | 6/312                                  |
| Unadjusted rate (95% CI)                   | 9.0 (4.7, 13.2)                  | 16.8 (9.3, 24.4)                                                    | 19.2 (3.8, 34.6)                       |
| Adjusted rate (95% CI)                     | 9.0 (4.5, 13.5)                  | 16.4 (8.8, 24.1)                                                    | 20.8 (4.1, 37.6)                       |
| Adjusted rate difference (95% CI)          | 0 (ref)                          | 7.4 (-1.4, 16.3)                                                    | 11.8 (-1.4, 16.3)                      |
| Hazard ratio (95% CI)                      | 1 (ref)                          | 1.49 (0.77, 2.88)                                                   | 1.83 (0.71, 4.68)                      |
| <b>LDL cholesterol 70 to &lt;100 mg/dL</b> |                                  |                                                                     |                                        |
|                                            | <b>N=443</b>                     | <b>N=207</b>                                                        | <b>N=70</b>                            |
| ASCVD events                               |                                  |                                                                     |                                        |
| Events/person-years                        | 67/3,735                         | 66/1,469                                                            | 32/349                                 |
| Unadjusted rate (95% CI)                   | 17.9 (13.6, 22.2)                | 44.9 (34.1, 55.8)                                                   | 91.7 (59.9, 123.4)                     |
| Adjusted rate (95% CI)                     | 19.9 (14.9, 24.8)                | 46.5 (35.2, 57.8)                                                   | 97.2 (61.5, 132.9)                     |
| Adjusted rate difference (95% CI)          | 0 (ref)                          | 26.6 (14.3, 39.0)                                                   | 77.3 (41.3, 113.4)                     |
| Hazard ratio (95% CI)                      | 1 (ref)                          | 2.15 (1.53, 3.03)                                                   | 3.64 (2.34, 5.67)                      |
| Myocardial infarction                      |                                  |                                                                     |                                        |
| Events/person-years                        | 47/3,823                         | 48/1,559                                                            | 16/418                                 |
| Unadjusted rate (95% CI)                   | 12.3 (8.8, 15.8)                 | 30.8 (22.1, 39.5)                                                   | 38.3 (19.5, 57.0)                      |
| Adjusted rate (95% CI)                     | 13.8 (9.8, 17.9)                 | 32.2 (23.0, 41.4)                                                   | 39.6 (18.8, 60.4)                      |
| Adjusted rate difference (95% CI)          | 0 (ref)                          | 18.4 (8.3, 28.4)                                                    | 25.8 (4.6, 47.0)                       |
| Hazard ratio (95% CI)                      | 1 (ref)                          | 2.18 (1.44, 3.29)                                                   | 2.28 (1.27, 4.09)                      |



|                                                    |                   |                   |                                 |
|----------------------------------------------------|-------------------|-------------------|---------------------------------|
| <b>Ischemic stroke</b>                             |                   |                   |                                 |
| Events/person-years                                | 17/3,976          | 10/1,675          | 8/446                           |
| Unadjusted rate (95% CI)                           | 4.3 (2.2, 6.3)    | 6.0 (2.3, 9.7)    | 17.9 (5.5, 30.3)                |
| Adjusted rate (95% CI)                             | 4.6 (2.4, 6.9)    | 6.3 (2.4, 10.3)   | 20.7 (5.6, 35.7)                |
| Adjusted rate difference (95% CI)                  | 0 (ref)           | 1.7 (-2.9, 6.3)   | 16.1 (0.8, 31.3)                |
| Hazard ratio (95% CI)                              | 1 (ref)           | 1.15 (0.53, 2.48) | 2.90 (1.23, 6.84)               |
| <b>Peripheral artery disease</b>                   |                   |                   |                                 |
| Events/person-years                                | 17/3,936          | 19/1,640          | 15/439                          |
| Unadjusted rate (95% CI)                           | 4.3 (2.3, 6.4)    | 11.6 (6.4, 17.0)  | 34.2 (16.9, 51.5)               |
| Adjusted rate (95% CI)                             | 4.7 (2.4, 7.1)    | 11.7 (6.5, 17.0)  | 40.0 (16.9, 63.2)               |
| Adjusted rate difference (95% CI)                  | 0 (ref)           | 7.0 (1.2, 12.8)   | 35.3 (12.1, 58.5)               |
| Hazard ratio (95% CI)                              | 1 (ref)           | 2.47 (1.26, 4.83) | 6.13 (2.91, 12.91)              |
| <b>LDL cholesterol <math>\geq</math> 100 mg/dL</b> |                   |                   |                                 |
|                                                    | <b>N=367</b>      | <b>N=109</b>      | <b>N=39</b>                     |
| <b>ASCVD events</b>                                |                   |                   |                                 |
| Events/person-years                                | 51/3,187          | 32/757            | 13/226                          |
| Unadjusted rate (95% CI)                           | 16.0 (11.6, 20.4) | 42.3 (27.6, 56.9) | 57.5 (26.2, 88.7)               |
| Adjusted rate (95% CI)                             | 16.9 (11.6, 22.1) | 43.7 (27.8, 59.6) | 91.3 (23.1, 159.5) <sup>†</sup> |
| Adjusted rate difference (95% CI)                  | 0 (ref)           | 26.8 (10.1, 43.6) | 74.4 (6.1, 142.8)               |
| Hazard ratio (95% CI)                              | 1 (ref)           | 2.21 (1.40, 3.48) | 2.71 (1.44, 5.10)               |
| <b>Myocardial infarction</b>                       |                   |                   |                                 |
| Events/person-years                                | 34/3,276          | 20/804            | 8/248                           |
| Unadjusted rate (95% CI)                           | 10.4 (6.9, 13.9)  | 24.9 (14.0, 35.8) | 32.3 (9.9, 54.5)                |
| Adjusted rate (95% CI)                             | 11.8 (7.3, 16.3)  | 24.9 (13.4, 36.5) | 28.1 (6.6, 49.6)                |
| Adjusted rate difference (95% CI)                  | 0 (ref)           | 13.1 (0.8, 25.5)  | 16.3 (-5.7, 38.2)               |
| Hazard ratio (95% CI)                              | 1 (ref)           | 1.86 (1.04, 3.32) | 2.11 (0.96, 4.64)               |
| <b>Ischemic stroke</b>                             |                   |                   |                                 |
| Events/person-years                                | 12/3,382          | 11/847            | 6/255                           |
| Unadjusted rate (95% CI)                           | 3.5 (1.5, 5.6)    | 13.0 (5.3, 20.7)  | 23.5 (4.7, 42.3)                |
| Adjusted rate (95% CI)                             | 3.0 (1.1, 4.9)    | 13.7 (5.3, 22.1)  | 27.1 (0.0, 54.9)*               |
| Adjusted rate difference (95% CI)                  | 0 (ref)           | 10.7 (2.0, 19.3)  | 24.1 (-3.7, 51.9)               |
| Hazard ratio (95% CI)                              | 1 (ref)           | 3.33 (1.48, 7.45) | 5.53 (2.11, 14.46)              |
| <b>Peripheral artery disease</b>                   |                   |                   |                                 |
| Events/person-years                                | 13/3,338          | 7/871             | 2/254                           |
| Unadjusted rate (95% CI)                           | 3.9 (1.8, 6.0)    | 8.0 (2.1, 14.0)   | 7.9 (0.0, 18.8)*                |
| Adjusted rate (95% CI)                             | 3.4 (1.4, 5.4)    | 8.7 (2.0, 15.4)   | 10.7 (0.0, 27.8)*               |
| Adjusted rate difference (95% CI)                  | 0 (ref)           | 5.3 (-1.7, 12.3)  | 7.3 (-9.9, 24.5)                |
| Hazard ratio (95% CI)                              | 1 (ref)           | 1.99 (0.77, 5.11) | 1.67 (0.37, 7.65)               |

ACC: American College of Cardiology; AHA: American Heart Association; ASCVD: Atherosclerotic cardiovascular disease; CI: confidence interval; LDL: low-density lipoprotein.

ASCVD events include myocardial infarction and ischemic stroke or peripheral artery disease.

Rates and rate differences are expressed per 1,000 person-years. Adjusted rates were calculated using direct standardization, with the standard population being all participants with very high ASCVD risk: men <55 years (8.7%), men 55 to 65 years (24.4%), men 65 to 70 years (15.1%), men  $\geq$ 70 years (14.2%), women <55 years (5.9%), women 55 to 65 years (14.7%), women 65 to 70 years (8.7%), and women  $\geq$ 70 years (8.3%).

Hazard ratios were adjusted for age and sex, and account for the competing risk of death.

There were 105 participants with missing LDL cholesterol and were not included in this table.

\* A lower 95% confidence limit  $<0$  was calculated. However, we reported a 95% confidence limit of zero instead as rates cannot be negative.

†Some age-sex groups used for direct standardization of rates included a very small number of events and participants. Therefore, caution is needed when interpreting adjusted rates.

**Table S5.** Atherosclerotic cardiovascular disease event rates and hazard ratios by the 2018 AHA/ACC atherosclerotic cardiovascular disease risk categories censoring participants when they titrated to a low-intensity statin or discontinued statin treatment.

| Outcomes                          | ASCVD risk category              |                                                                     |                                        |
|-----------------------------------|----------------------------------|---------------------------------------------------------------------|----------------------------------------|
|                                   | No history of major ASCVD events | History of one major ASCVD event with multiple high-risk conditions | History of $\geq 2$ major ASCVD events |
|                                   | n=1,106                          | n=488                                                               | n=159                                  |
| <b>ASCVD events</b>               |                                  |                                                                     |                                        |
| Events/person-years               | 136/7,002                        | 115/2,752                                                           | 47/713                                 |
| Unadjusted rate (95% CI)          | 19.4 (16.2, 22.7)                | 41.8 (34.2, 49.4)                                                   | 65.9 (47.1, 84.8)                      |
| Adjusted rate (95% CI)            | 21.7 (17.9, 25.6)                | 42.4 (34.6, 50.3)                                                   | 70.2 (48.7, 91.8)                      |
| Adjusted rate difference (95% CI) | 0 (ref)                          | 20.7 (12.0, 29.4)                                                   | 48.5 (26.6, 70.4)                      |
| Hazard ratio (95% CI)             | 1 (ref)                          | 1.81 (1.41, 2.33)                                                   | 2.53 (1.79, 3.57)                      |
| <b>Myocardial infarction</b>      |                                  |                                                                     |                                        |
| Events/person-years               | 94/7,125                         | 80/2,900                                                            | 23/801                                 |
| Unadjusted rate (95% CI)          | 13.2 (10.5, 15.9)                | 27.6 (21.5, 33.6)                                                   | 28.7 (17.0, 40.4)                      |
| Adjusted rate (95% CI)            | 15.3 (12.1, 18.6)                | 28.1 (21.9, 34.4)                                                   | 30.5 (17.0, 44.0)                      |
| Adjusted rate difference (95% CI) | 0 (ref)                          | 12.8 (5.8, 19.8)                                                    | 15.2 (1.3, 29.0)                       |
| Hazard ratio (95% CI)             | 1 (ref)                          | 1.74 (1.28, 2.37)                                                   | 1.61 (1.01, 2.58)                      |
| <b>Ischemic stroke</b>            |                                  |                                                                     |                                        |
| Events/person-years               | 32/7,408                         | 24/3,070                                                            | 14/831                                 |
| Unadjusted rate (95% CI)          | 4.3 (2.8, 5.8)                   | 7.8 (4.7, 10.9)                                                     | 16.8 (8.0, 25.7)                       |
| Adjusted rate (95% CI)            | 4.5 (2.9, 6.2)                   | 7.8 (4.7, 11.0)                                                     | 17.2 (7.7, 26.8)                       |
| Adjusted rate difference (95% CI) | 0 (ref)                          | 3.3 (-0.2, 6.9)                                                     | 12.7 (3.0, 22.4)                       |
| Hazard ratio (95% CI)             | 1 (ref)                          | 1.53 (0.90, 2.60)                                                   | 2.87 (1.54, 5.34)                      |
| <b>Peripheral artery disease</b>  |                                  |                                                                     |                                        |
| Events/person-years               | 30/7,358                         | 33/3,049                                                            | 18/809                                 |
| Unadjusted rate (95% CI)          | 4.1 (2.6, 5.5)                   | 10.8 (7.1, 14.5)                                                    | 22.2 (12.0, 32.5)                      |
| Adjusted rate (95% CI)            | 4.2 (2.6, 5.8)                   | 11.0 (7.2, 14.8)                                                    | 26.2 (13.1, 39.3)                      |
| Adjusted rate difference (95% CI) | 0 (ref)                          | 6.8 (2.7, 10.9)                                                     | 22.0 (8.8, 35.2)                       |
| Hazard ratio (95% CI)             | 1 (ref)                          | 2.42 (1.47, 4.00)                                                   | 4.62 (2.51, 8.52)                      |

ACC: American College of Cardiology; AHA: American Heart Association; ASCVD: Atherosclerotic cardiovascular disease; CI: confidence interval.

ASCVD events include myocardial infarction, ischemic stroke or peripheral artery disease.

Rates and rate differences are expressed per 1,000 person-years. Adjusted rates were calculated using direct standardization, with the standard population being all participants with very high ASCVD risk: men <55 years (8.7%), men 55 to 65 years (24.4%), men 65 to 70 years (15.1%), men  $\geq 70$  years (14.2%), women <55 years (5.9%), women 55 to 65 years (14.7%), women 65 to 70 years (8.7%), and women  $\geq 70$  years (8.3%).

Hazard ratios were adjusted for age and sex, and account for the competing risk of death.

**Table S6.** Total cardiovascular disease, heart failure, and all-cause mortality event rates and hazard ratios by the 2018 AHA/ACC atherosclerotic cardiovascular disease risk categories.

| Outcomes                          | ASCVD risk category              |                                                                     |                                        |
|-----------------------------------|----------------------------------|---------------------------------------------------------------------|----------------------------------------|
|                                   | No history of major ASCVD events | History of one major ASCVD event with multiple high-risk conditions | History of $\geq 2$ major ASCVD events |
|                                   | n=1,106                          | n=488                                                               | n=159                                  |
| Total CVD events                  |                                  |                                                                     |                                        |
| Events/person-years               | 307/8,704                        | 247/2987                                                            | 84/777                                 |
| Unadjusted rate (95% CI)          | 35.3 (31.3, 39.2)                | 82.7 (72.4, 93.0)                                                   | 108.1 (85.0, 131.2)                    |
| Adjusted rate (95% CI)            | 38.1 (33.5, 42.6)                | 84.8 (74.1, 95.5)                                                   | 115.2 (88.4, 141.9)                    |
| Adjusted rate difference (95% CI) | 0 (ref)                          | 46.7 (35.1, 58.3)                                                   | 77.1 (49.9, 104.3)                     |
| Hazard ratio (95% CI)             | 1 (ref)                          | 2.08 (1.76, 2.47)                                                   | 2.30 (1.78, 2.96)                      |
| Heart failure                     |                                  |                                                                     |                                        |
| Events/person-years               | 204/9,137                        | 176/3,349                                                           | 59/934                                 |
| Unadjusted rate (95% CI)          | 22.3 (19.3, 25.4)                | 52.6 (44.8, 60.3)                                                   | 63.2 (47.1, 79.3)                      |
| Adjusted rate (95% CI)            | 24.0 (20.5, 27.5)                | 54.2 (46.1, 62.3)                                                   | 63.7 (46.6, 80.8)                      |
| Adjusted rate difference (95% CI) | 0 (ref)                          | 30.2 (21.4, 39.1)                                                   | 39.7 (22.3, 57.1)                      |
| Hazard ratio (95% CI)             | 1 (ref)                          | 2.12 (1.73, 2.60)                                                   | 2.22 (1.65, 3.00)                      |
| All-cause mortality               |                                  |                                                                     |                                        |
| Events/person-years               | 343/10,604                       | 246/4,138                                                           | 98/1,165                               |
| Unadjusted rate (95% CI)          | 32.3 (28.9, 35.8)                | 59.4 (52.0, 66.9)                                                   | 84.1 (67.5, 100.8)                     |
| Adjusted rate (95% CI)            | 37.5 (33.3, 41.8)                | 61.7 (53.9, 69.5)                                                   | 90.2 (71.2, 109.2)                     |
| Adjusted rate difference (95% CI) | 0 (ref)                          | 24.2 (15.3, 33.0)                                                   | 52.7 (33.2, 72.1)                      |
| Hazard ratio (95% CI)             | 1 (ref)                          | 1.68 (1.42, 1.98)                                                   | 2.38 (1.89, 2.98)                      |

ACC: American College of Cardiology; AHA: American Heart Association; ASCVD: Atherosclerotic cardiovascular disease; CI: confidence interval; CVD: cardiovascular disease.

Total CVD events include ASCVD events or heart failure. ASCVD events include myocardial infarction, ischemic stroke or peripheral artery disease.

Rates and rate differences are expressed per 1,000 person-years. Adjusted rates were calculated using direct standardization, with the standard population being all participants with very high ASCVD risk: men <55 years (8.7%), men 55 to 65 years (24.4%), men 65 to 70 years (15.1%), men  $\geq 70$  years (14.2%), women <55 years (5.9%), women 55 to 65 years (14.7%), women 65 to 70 years (8.7%), and women  $\geq 70$  years (8.3%).

Hazard ratios were adjusted for age and sex, and account for the competing risk of death except for all-cause mortality. No competing risk was considered for the analysis of all-cause mortality.

**Table S7.** Total cardiovascular disease, heart failure and all-cause mortality event rates and hazard ratios by the 2018 AHA/ACC atherosclerotic cardiovascular disease risk categories and estimated glomerular filtration rate levels.

| Outcomes                                           | ASCVD risk category              |                                                                     |                                        |
|----------------------------------------------------|----------------------------------|---------------------------------------------------------------------|----------------------------------------|
|                                                    | No history of major ASCVD events | History of one major ASCVD event with multiple high-risk conditions | History of $\geq 2$ major ASCVD events |
| <b>eGFR &lt; 30 mL/min/1.73 m<sup>2</sup></b>      |                                  |                                                                     |                                        |
|                                                    | <b>N=279</b>                     | <b>N=135</b>                                                        | <b>N=61</b>                            |
| Total CVD events                                   |                                  |                                                                     |                                        |
| Events/person-years                                | 112/1,765                        | 83/559                                                              | 36/225                                 |
| Unadjusted rate (95% CI)                           | 63.5 (51.7, 75.2)                | 148.5 (116.6, 180.5)                                                | 160.0 (107.5, 211.9)                   |
| Adjusted rate (95% CI)                             | 75.7 (59.8, 91.6)                | 162.3 (125.2, 199.4)                                                | 193.0 (106.5, 279.6)*                  |
| Adjusted rate difference (95% CI)                  | 0 (ref)                          | 86.6 (46.2, 127.0)                                                  | 117.3 (29.3, 205.3)                    |
| Hazard ratio (95% CI)                              | 1 (ref)                          | 1.82 (1.35, 2.44)                                                   | 1.70 (1.16, 2.50)                      |
| Heart failure                                      |                                  |                                                                     |                                        |
| Events/person-years                                | 86/1,883                         | 64/655                                                              | 30/248                                 |
| Unadjusted rate (95% CI)                           | 45.7 (36.0, 55.3)                | 97.7 (73.7, 121.6)                                                  | 121.0 (77.8, 164.5)                    |
| Adjusted rate (95% CI)                             | 51.4 (39.1, 63.8)                | 104.1 (77.0, 131.2)                                                 | 149.2 (77.4, 221.1)*                   |
| Adjusted rate difference (95% CI)                  | 0 (ref)                          | 52.7 (22.9, 82.5)                                                   | 97.8 (24.9, 170.7)                     |
| Hazard ratio (95% CI)                              | 1 (ref)                          | 1.72 (1.22, 2.40)                                                   | 1.80 (1.18, 2.75)                      |
| All-cause mortality                                |                                  |                                                                     |                                        |
| Events/person-years                                | 135/2,329                        | 94/934                                                              | 47/359                                 |
| Unadjusted rate (95% CI)                           | 58.0 (48.2, 67.7)                | 100.6 (80.3, 121.0)                                                 | 130.9 (93.6, 168.6)                    |
| Adjusted rate (95% CI)                             | 70.1 (56.8, 83.3)                | 104.9 (82.7, 127.2)                                                 | 146.9 (98.2, 195.5)*                   |
| Adjusted rate difference (95% CI)                  | 0 (ref)                          | 34.8 (8.9, 60.7)                                                    | 76.8 (26.4, 127.2)                     |
| Hazard ratio (95% CI)                              | 1 (ref)                          | 1.56 (1.19, 2.04)                                                   | 2.22 (1.58, 3.11)                      |
| <b>eGFR 30 to &lt;45 mL/min/1.73 m<sup>2</sup></b> |                                  |                                                                     |                                        |
|                                                    | <b>N=380</b>                     | <b>N=169</b>                                                        | <b>N=57</b>                            |
| Total CVD events                                   |                                  |                                                                     |                                        |
| Events/person-years                                | 106/3,028                        | 89/1,074                                                            | 26/298                                 |
| Unadjusted rate (95% CI)                           | 35.0 (28.3, 41.7)                | 82.9 (65.7, 100.1)                                                  | 87.2 (53.6, 120.6)                     |
| Adjusted rate (95% CI)                             | 36.8 (29.5, 44.1)                | 88.7 (69.9, 107.4)                                                  | 95.1 (53.6, 136.6)                     |
| Adjusted rate difference (95% CI)                  | 0 (ref)                          | 51.9 (31.8, 72.0)                                                   | 58.3 (16.2, 100.4)                     |
| Hazard ratio (95% CI)                              | 1 (ref)                          | 2.21 (1.67, 2.92)                                                   | 1.85 (1.16, 2.95)                      |
| Heart failure                                      |                                  |                                                                     |                                        |
| Events/person-years                                | 70/3,136                         | 66/1,205                                                            | 19/359                                 |
| Unadjusted rate (95% CI)                           | 22.3 (17.1, 27.6)                | 54.8 (41.5, 68.0)                                                   | 52.9 (29.1, 76.7)                      |
| Adjusted rate (95% CI)                             | 22.8 (17.2, 28.3)                | 58.0 (43.8, 72.2)                                                   | 55.7 (28.6, 82.8)                      |
| Adjusted rate difference (95% CI)                  | 0 (ref)                          | 35.2 (20.0, 50.5)                                                   | 32.9 (5.3, 60.6)                       |
| Hazard ratio (95% CI)                              | 1 (ref)                          | 2.32 (1.66, 3.24)                                                   | 1.92 (1.14, 3.24)                      |
| All-cause mortality                                |                                  |                                                                     |                                        |
| Events/person-years                                | 127/3,627                        | 91/1,457                                                            | 36/421                                 |
| Unadjusted rate (95% CI)                           | 35.0 (28.9, 41.1)                | 62.5 (49.6, 75.3)                                                   | 85.5 (57.5, 113.4)                     |
| Adjusted rate (95% CI)                             | 39.7 (32.6, 46.9)                | 66.1 (52.3, 80.0)                                                   | 120.8 (34.2, 207.4)*                   |
| Adjusted rate difference (95% CI)                  | 0 (ref)                          | 26.4 (10.8, 42.0)                                                   | 81.1 (-5.8, 167.9)                     |

| Hazard ratio (95% CI)                                     | 1 (ref)           | 1.70 (1.29, 2.22)  | 2.21 (1.52, 3.20)   |
|-----------------------------------------------------------|-------------------|--------------------|---------------------|
| <b>eGFR <math>\geq</math>45 mL/min/1.73 m<sup>2</sup></b> |                   |                    |                     |
|                                                           | <b>N=409</b>      | <b>N=166</b>       | <b>N=40</b>         |
| Total CVD events                                          |                   |                    |                     |
| Events/person-years                                       | 78/3,666          | 67/1,261           | 21/253              |
| Unadjusted rate (95% CI)                                  | 21.3 (16.6, 26.0) | 53.1 (40.4, 65.9)  | 83.0 (47.6, 118.6)  |
| Adjusted rate (95% CI)                                    | 22.4 (16.9, 28.0) | 79.0 (23.2, 134.9) | 94.7 (49.1, 140.4)* |
| Adjusted rate difference (95% CI)                         | 0 (ref)           | 56.6 (0.5, 112.7)  | 72.3 (26.3, 118.3)  |
| Hazard ratio (95% CI)                                     | 1 (ref)           | 2.35 (1.69, 3.26)  | 3.60 (2.18, 5.95)   |
| Heart failure                                             |                   |                    |                     |
| Events/person-years                                       | 39/3,863          | 41/1,387           | 10/326              |
| Unadjusted rate (95% CI)                                  | 10.1 (6.9, 13.3)  | 29.6 (20.5, 38.6)  | 30.7 (11.7, 49.7)   |
| Adjusted rate (95% CI)                                    | 11.7 (7.6, 15.9)  | 56.3 (1.4, 111.2)  | 36.1 (7.9, 64.2)    |
| Adjusted rate difference (95% CI)                         | 0 (ref)           | 44.6 (-10.5, 99.6) | 24.4 (-4.1, 52.8)   |
| Hazard ratio (95% CI)                                     | 1 (ref)           | 2.69 (1.73, 4.19)  | 2.71 (1.33, 5.52)   |
| All-cause mortality                                       |                   |                    |                     |
| Events/person-years                                       | 65/4,322          | 54/1,603           | 14/384              |
| Unadjusted rate (95% CI)                                  | 15.0 (11.4, 18.7) | 33.7 (24.7, 42.7)  | 36.5 (17.3, 55.5)   |
| Adjusted rate (95% CI)                                    | 18.4 (13.4, 23.4) | 44.9 (18.7, 71.0)  | 41.0 (18.2, 63.8)   |
| Adjusted rate difference (95% CI)                         | 0 (ref)           | 26.5 (-0.2, 53.1)  | 22.6 (-0.7, 46.0)   |
| Hazard ratio (95% CI)                                     | 1 (ref)           | 2.00 (1.39, 2.88)  | 2.10 (1.17, 3.77)   |

ACC: American College of Cardiology; AHA: American Heart Association; ASCVD: Atherosclerotic cardiovascular disease; CI: confidence interval; CVD: cardiovascular disease; eGFR: estimated glomerular filtration rate.

Total CVD events include ASCVD events or heart failure. ASCVD events include myocardial infarction, ischemic stroke or peripheral artery disease.

Rates and rate differences are expressed per 1,000 person-years. Adjusted rates were calculated using direct standardization, with the standard population being all participants with very high ASCVD risk: men <55 years (8.7%), men 55 to 65 years (24.4%), men 65 to 70 years (15.1%), men  $\geq$ 70 years (14.2%), women <55 years (5.9%), women 55 to 65 years (14.7%), women 65 to 70 years (8.7%), and women  $\geq$ 70 years (8.3%).

Hazard ratios were adjusted for age and sex, and account for the competing risk of death except for all-cause mortality. No competing risk was considered for the analysis of all-cause mortality.

There were 57 participants with missing estimated glomerular filtration rate and were not included in this table.

\*Some age-sex groups used for direct standardization of rates included a very small number of events and participants. Therefore, caution is needed when interpreting adjusted rates.

**Table S8.** Total cardiovascular disease, heart failure and all-cause mortality event rates and hazard ratios by the 2018 AHA/ACC atherosclerotic cardiovascular disease risk categories and on-treatment LDL cholesterol levels.

| Outcomes                                   | ASCVD risk category              |                                                                     |                                        |
|--------------------------------------------|----------------------------------|---------------------------------------------------------------------|----------------------------------------|
|                                            | No history of major ASCVD events | History of one major ASCVD event with multiple high-risk conditions | History of $\geq 2$ major ASCVD events |
| <b>LDL cholesterol &lt; 70 mg/dL</b>       |                                  |                                                                     |                                        |
| <b>N</b>                                   | <b>220</b>                       | <b>148</b>                                                          | <b>45</b>                              |
| Total CVD events                           |                                  |                                                                     |                                        |
| Events/person-years                        | 74/1,672                         | 74/917                                                              | 25/252                                 |
| Unadjusted rate (95% CI)                   | 44.3 (34.2, 54.3)                | 80.7 (62.3, 99.1)                                                   | 99.2 (60.3, 138.0)                     |
| Adjusted rate (95% CI)                     | 48.1 (36.4, 59.8)                | 87.0 (66.0, 107.9)                                                  | 107.0 (62.1, 152.0)                    |
| Adjusted rate difference (95% CI)          | 0 (ref)                          | 38.9 (14.8, 62.9)                                                   | 58.9 (12.5, 105.4)                     |
| Hazard ratio (95% CI)                      | 1 (ref)                          | 1.60 (1.16, 2.22)                                                   | 1.76 (1.12, 2.76)                      |
| Heart failure                              |                                  |                                                                     |                                        |
| Events/person-years                        | 48/1,736                         | 56/1,012                                                            | 18/287                                 |
| Unadjusted rate (95% CI)                   | 27.6 (19.8, 35.5)                | 55.3 (40.9, 69.8)                                                   | 62.7 (33.8, 91.7)                      |
| Adjusted rate (95% CI)                     | 30.9 (21.5, 40.3)                | 58.5 (42.4, 74.5)                                                   | 66.1 (33.2, 99.0)                      |
| Adjusted rate difference (95% CI)          | 0 (ref)                          | 27.6 (8.9, 46.2)                                                    | 35.2 (0.9, 69.4)                       |
| Hazard ratio (95% CI)                      | 1 (ref)                          | 1.77 (1.20, 2.62)                                                   | 1.88 (1.09, 3.24)                      |
| All-cause mortality                        |                                  |                                                                     |                                        |
| Events/person-years                        | 74/2,081                         | 80/1,235                                                            | 25/356                                 |
| Unadjusted rate (95% CI)                   | 35.6 (27.5, 43.7)                | 64.8 (50.6, 79.0)                                                   | 70.2 (42.7, 97.8)                      |
| Adjusted rate (95% CI)                     | 39.7 (30.1, 49.2)                | 65.1 (50.5, 79.7)                                                   | 68.1 (39.7, 96.5)                      |
| Adjusted rate difference (95% CI)          | 0 (ref)                          | 25.4 (8.0, 42.9)                                                    | 28.4 (-1.6, 58.4)                      |
| Hazard ratio (95% CI)                      | 1 (ref)                          | 1.65 (1.20, 2.27)                                                   | 1.72 (1.09, 2.72)                      |
| <b>LDL cholesterol 70 to &lt;100 mg/dL</b> |                                  |                                                                     |                                        |
| <b>N</b>                                   | <b>N=443</b>                     | <b>N=207</b>                                                        | <b>N=70</b>                            |
| Total CVD events                           |                                  |                                                                     |                                        |
| Events/person-years                        | 111/3,559                        | 108/1,284                                                           | 38/310                                 |
| Unadjusted rate (95% CI)                   | 31.2 (25.4, 37.0)                | 84.1 (68.2, 100.0)                                                  | 122.6 (83.6, 161.5)                    |
| Adjusted rate (95% CI)                     | 33.8 (27.2, 40.4)                | 86.1 (69.7, 102.4)                                                  | 123.8 (81.9, 165.7)                    |
| Adjusted rate difference (95% CI)          | 0 (ref)                          | 52.3 (34.6, 69.9)                                                   | 90.0 (47.6, 132.4)                     |
| Hazard ratio (95% CI)                      | 1 (ref)                          | 2.46 (1.88, 3.20)                                                   | 2.85 (1.91, 4.26)                      |
| Heart failure                              |                                  |                                                                     |                                        |
| Events/person-years                        | 73/3,767                         | 79/1,435                                                            | 22/414                                 |
| Unadjusted rate (95% CI)                   | 19.4 (14.9, 23.8)                | 55.1 (42.9, 67.2)                                                   | 53.1 (30.9, 75.3)                      |
| Adjusted rate (95% CI)                     | 21.5 (16.3, 26.7)                | 56.0 (43.5, 68.3)                                                   | 52.5 (28.0, 77.1)                      |
| Adjusted rate difference (95% CI)          | 0 (ref)                          | 34.5 (20.9, 47.9)                                                   | 31.0 (5.9, 56.1)                       |
| Hazard ratio (95% CI)                      | 1 (ref)                          | 2.60 (1.88, 3.58)                                                   | 2.15 (1.30, 3.55)                      |
| All-cause mortality                        |                                  |                                                                     |                                        |
| Events/person-years                        | 141/4,242                        | 105/1,779                                                           | 43/501                                 |
| Unadjusted rate (95% CI)                   | 33.2 (27.8, 38.7)                | 59.0 (47.7, 70.3)                                                   | 85.8 (60.2, 111.5)                     |
| Adjusted rate (95% CI)                     | 37.6 (31.2, 44.0)                | 60.1 (48.5, 71.6)                                                   | 92.5 (62.5, 122.6)                     |
| Adjusted rate difference (95% CI)          | 0 (ref)                          | 22.5 (9.2, 35.6)                                                    | 54.9 (24.2, 85.6)                      |

|                                                    |                   |                    |                      |
|----------------------------------------------------|-------------------|--------------------|----------------------|
| Hazard ratio (95% CI)                              | 1 (ref)           | 1.66 (1.28, 2.13)  | 2.44 (1.73, 3.44)    |
| <b>LDL cholesterol <math>\geq</math> 100 mg/dL</b> |                   |                    |                      |
| <b>N</b>                                           | <b>N=367</b>      | <b>N=109</b>       | <b>N=39</b>          |
| Total CVD events                                   |                   |                    |                      |
| Events/person-years                                | 94/2,947          | 53/663             | 19/188               |
| Unadjusted rate (95% CI)                           | 31.9 (25.4, 38.3) | 79.9 (58.4, 101.4) | 101.1 (55.7, 146.7)  |
| Adjusted rate (95% CI)                             | 33.2 (25.4, 40.9) | 88.2 (62.6, 113.9) | 198.5 (44.8, 352.1)* |
| Adjusted rate difference (95% CI)                  | 0 (ref)           | 55.0 (28.3, 81.9)  | 165.2 (11.4, 319.2)  |
| Hazard ratio (95% CI)                              | 1 (ref)           | 2.25 (1.59, 3.20)  | 2.43 (1.45, 4.06)    |
| Heart failure                                      |                   |                    |                      |
| Events/person-years                                | 67/3,087          | 34/766             | 17/205               |
| Unadjusted rate (95% CI)                           | 21.7 (16.5, 26.9) | 44.4 (29.5, 59.3)  | 82.9 (43.4, 122.0)   |
| Adjusted rate (95% CI)                             | 21.7 (15.7, 27.7) | 48.4 (30.7, 66.1)  | 76.5 (34.4, 118.8)   |
| Adjusted rate difference (95% CI)                  | 0 (ref)           | 26.7 (8.0, 45.3)   | 54.8 (12.2, 97.4)    |
| Hazard ratio (95% CI)                              | 1 (ref)           | 1.85 (1.22, 2.81)  | 2.96 (1.71, 5.12)    |
| All-cause mortality                                |                   |                    |                      |
| Events/person-years                                | 104/3,624         | 52/925             | 26/273               |
| Unadjusted rate (95% CI)                           | 28.7 (22.2, 34.2) | 56.2 (40.9, 71.5)  | 95.2 (58.6, 131.7)   |
| Adjusted rate (95% CI)                             | 35.5 (27.5, 43.4) | 60.4 (43.1, 77.7)  | 121.0 (63.6, 178.4)* |
| Adjusted rate difference (95% CI)                  | 0 (ref)           | 24.9 (5.9, 44.0)   | 85.5 (27.6, 143.5)   |
| Hazard ratio (95% CI)                              | 1 (ref)           | 1.79 (1.28, 2.52)  | 3.08 (1.97, 4.79)    |

ACC: American College of Cardiology; AHA: American Heart Association; ASCVD: Atherosclerotic cardiovascular disease; CI: confidence interval; CVD: cardiovascular disease; LDL: low-density lipoprotein.

Total CVD events include ASCVD events or heart failure. ASCVD events include myocardial infarction, ischemic stroke or peripheral artery disease.

Rates and rate differences are expressed per 1,000 person-years. Adjusted rates were calculated using direct standardization, with the standard population being all participants with very high ASCVD risk: men <55 years (8.7%), men 55 to 65 years (24.4%), men 65 to 70 years (15.1%), men  $\geq$ 70 years (14.2%), women <55 years (5.9%), women 55 to 65 years (14.7%), women 65 to 70 years (8.7%), and women  $\geq$ 70 years (8.3%).

Hazard ratios were adjusted for age and sex, and account for the competing risk of death except for all-cause mortality. No competing risk was considered for the analysis of all-cause mortality.

There were 105 participants with missing low-density lipoprotein cholesterol and were not included in this table.

\*Some age-sex groups used for direct standardization of rates included a very small number of events and participants. Therefore, caution is needed when interpreting adjusted rates.



**Table S9.** Total cardiovascular disease, heart failure and all-cause mortality event rates and hazard ratios by the 2018 AHA/ACC atherosclerotic cardiovascular disease risk categories censoring participants when they titrated to a low-intensity statin or discontinued statin treatment.

| Outcomes                          | ASCVD risk category              |                                                                     |                                        |
|-----------------------------------|----------------------------------|---------------------------------------------------------------------|----------------------------------------|
|                                   | No history of major ASCVD events | History of one major ASCVD event with multiple high-risk conditions | History of $\geq 2$ major ASCVD events |
|                                   | n=1,106                          | n=488                                                               | n=159                                  |
| Total CVD events                  |                                  |                                                                     |                                        |
| Events/person-years               | 230/6,634                        | 207/2,419                                                           | 73/628                                 |
| Unadjusted rate (95% CI)          | 34.7 (30.2, 39.2)                | 85.6 (73.9, 97.2)                                                   | 116.2 (89.5, 142.8)                    |
| Adjusted rate (95% CI)            | 37.6 (32.4, 42.8)                | 88.3 (76.1, 100.5)                                                  | 122.8 (92.6, 153.1)                    |
| Adjusted rate difference (95% CI) | 0 (ref)                          | 50.7 (37.5, 64.0)                                                   | 85.2 (54.6, 115.9)                     |
| Hazard ratio (95% CI)             | 1 (ref)                          | 2.25 (1.86, 2.72)                                                   | 2.92 (2.24, 3.81)                      |
| Heart failure                     |                                  |                                                                     |                                        |
| Events/person-years               | 152/6,926                        | 149/2,710                                                           | 49/737                                 |
| Unadjusted rate (95% CI)          | 21.9 (18.5, 25.4)                | 55.0 (46.1, 63.8)                                                   | 66.5 (47.9, 85.1)                      |
| Adjusted rate (95% CI)            | 24.0 (19.9, 28.1)                | 57.5 (48.1, 66.8)                                                   | 66.4 (46.9, 85.9)                      |
| Adjusted rate difference (95% CI) | 0 (ref)                          | 33.5 (23.3, 43.7)                                                   | 42.4 (22.5, 62.3)                      |
| Hazard ratio (95% CI)             | 1 (ref)                          | 2.31 (1.84, 2.91)                                                   | 2.67 (1.93, 3.69)                      |
| All-cause mortality               |                                  |                                                                     |                                        |
| Events/person-years               | 237/7,934                        | 174/3,298                                                           | 72/894                                 |
| Unadjusted rate (95% CI)          | 29.9 (26.1, 33.7)                | 52.8 (44.9, 60.6)                                                   | 80.5 (61.9, 99.1)                      |
| Adjusted rate (95% CI)            | 34.2 (29.6, 38.8)                | 55.0 (46.8, 63.3)                                                   | 86.4 (64.9, 107.8)                     |
| Adjusted rate difference (95% CI) | 0 (ref)                          | 20.8 (11.4, 30.3)                                                   | 52.2 (30.2, 74.1)                      |
| Hazard ratio (95% CI)             | 1 (ref)                          | 1.58 (1.30, 1.93)                                                   | 2.45 (1.88, 3.20)                      |

ACC: American College of Cardiology; AHA: American Heart Association; ASCVD: Atherosclerotic cardiovascular disease; CI: confidence interval; CVD: cardiovascular disease.

Total CVD events include ASCVD events or heart failure. ASCVD events include myocardial infarction, ischemic stroke or peripheral artery disease.

Rates and rate differences are expressed per 1,000 person-years. Adjusted rates were calculated using direct standardization, with the standard population being all participants with very high ASCVD risk: men <55 years (8.7%), men 55 to 65 years (24.4%), men 65 to 70 years (15.1%), men  $\geq 70$  years (14.2%), women <55 years (5.9%), women 55 to 65 years (14.7%), women 65 to 70 years (8.7%), and women  $\geq 70$  years (8.3%).

Hazard ratios were adjusted for age and sex, and account for the competing risk of death except for all-cause mortality. No competing risk was considered for the analysis of all-cause mortality.

**Supplemental references:**

1. Grundy SM, Stone NJ, Bailey AL, Beam C, Birtcher KK, Blumenthal RS, et al. 2018 AHA/ACC/AACVPR/AAPA/ABC/ACPM/ADA/AGS/APhA/ASPC/NLA/PCNA Guideline on the Management of Blood Cholesterol: Executive Summary: A Report of the American College of Cardiology/American Heart Association Task Force on Clinical Practice Guidelines. *J Am Coll Cardiol*. 2019; 73:3168-209.
2. Thygesen K, Alpert JS, White HD, Jaffe AS, Apple FS, Galvani M, et al. Universal definition of myocardial infarction. *Circulation*. 2007; 116:2634-53.
3. Bansal N, Xie D, Sha D, Appel LJ, Deo R, Feldman HI, et al. Cardiovascular Events after New-Onset Atrial Fibrillation in Adults with CKD: Results from the Chronic Renal Insufficiency Cohort (CRIC) Study. 2018; 29:2859-69.
4. Rosamond WD, Folsom AR, Chambless LE, Wang CH, McGovern PG, Howard G, et al. Stroke incidence and survival among middle-aged adults: 9-year follow-up of the Atherosclerosis Risk in Communities (ARIC) cohort. *Stroke*. 1999; 30:736-43.
5. Chen J, Mohler ER, Xie D, Shlipak M, Townsend RR, Appel LJ, et al. Traditional and non-traditional risk factors for incident peripheral arterial disease among patients with chronic kidney disease. *Nephrology, dialysis, transplantation : official publication of the European Dialysis and Transplant Association - European Renal Association*. 2016; 31:1145-51.
6. Wang GJ, Shaw PA, Townsend RR, Anderson AH, Xie D, Wang X, et al. Sex Differences in the Incidence of Peripheral Artery Disease in the Chronic Renal Insufficiency Cohort. *Cir Cardiovasc Qual Outcomes*. 2016; 9:S86-93.
7. He J, Shlipak M, Anderson A, Roy JA, Feldman HI, Kallem RR, et al. Risk Factors for Heart Failure in Patients With Chronic Kidney Disease: The CRIC (Chronic Renal Insufficiency Cohort) Study. *J Am Coll Cardiol*. 2017; 6:e005336.
